# Supplementary material for: Tracking Sediment Provenance Applying a Linear Mixing Model Approach Using R’s FingerPro Package, in the Mining-Influenced Ocoña Watershed, Southern Peru
Source: MDPI journal article supplement (doi:10.3390/su151511856), 2023-08-01
Supplement: s1 [file s1]

## MIX SAMPLE 1 MODELING

### CONSENSUS RANKING

tracer score

```
1  As 98.00
2  Sc 97.85
3  Co 97.65
4  Cu 97.50
5  Be 97.40
6  V 94.45
```

CTS Methodology

| id      | w1        | w2         | w3          | Dw1        | Dw2       | Dw3        | cons   | Dmax      |
|---------|-----------|------------|-------------|------------|-----------|------------|--------|-----------|
| 1 Au Hg | 1.1315657 | -0.1193633 | -0.01220241 | 0.10611536 | 0.1118965 | 0.08695599 | 0.0005 | 0.1118965 |
| 2 K Au  | 1.2131846 | -0.2500000 | 0.03681545  | 0.11489329 | 0.1250338 | 0.07645958 | 0.0010 | 0.1250338 |
| 3 As Co | 0.6625061 | 0.2443123  | 0.09318158  | 0.07377637 | 0.1337190 | 0.13577691 | 0.6905 | 0.1357769 |
| 4 V Sc  | 0.6210258 | 0.4716509  | -0.09267669 | 0.09792268 | 0.1433045 | 0.14385136 | 0.2010 | 0.1438514 |
| 5 Hg Cd | 1.0715447 | -0.1300813 | 0.05853659  | 0.15808615 | 0.1289175 | 0.12868930 | 0.0130 | 0.1580862 |
| 6 V Cu  | 0.7958047 | 0.2746484  | -0.07045307 | 0.06329394 | 0.1214148 | 0.15887910 | 0.2765 | 0.1588791 |

#Explore those pairs (e.g. Au & Hg)

| tracer | err         | score |
|--------|-------------|-------|
| 8 V    | 0.002509641 | 94.45 |

#Explore those pairs (e.g. K & Au)

| tracer | err         | score |
|--------|-------------|-------|
| 4 K    | 0.000000000 | 88.80 |
| 8 V    | 0.008742674 | 94.45 |

#Explore those pairs (e.g. As & Co)

|       | tracer       | err | score |
|-------|--------------|-----|-------|
| 11 As | 0            |     | 98.00 |
| 15 Co | 0            |     | 97.65 |
| 12 Cu | 1.942890e-16 |     | 97.50 |

#Explore those pairs (e.g. V & Sc)

| tracer | err          | score |
|--------|--------------|-------|
| 8 V    | 0.000000e+00 | 94.45 |
| 15 Co  | 1.100596e-03 | 97.65 |
| 25 Sc  | 3.330669e-16 | 97.85 |

#Explore those pairs (e.g. Hg & Cd)

| tracer | err        | score |
|--------|------------|-------|
| 8 V    | 0.01515173 | 94.45 |

#Explore those pairs (e.g. V & Cu)

```

tracer      err score
8   V 2.220446e-16 94.45
11  As 2.701040e-03 98.00
12  Cu 1.942890e-16 97.50

```

"Source", "As", "Cu", "V", "DAs", "DCu", "DV", "n")

```

id  GOF.mean  GOF.SD  Upper.mean  Upper.SD  Middle.mean  Middle.SD  Lower.mean  Lower.SD
1  4 0.96    0.033   0.800     0.075    0.260      0.096    -0.064    0.11

```

"Source", "Sc", "Co", "V", "DSc", "DCo", "DV", "n")

```

id  GOF.mean  GOF.SD  Upper.mean  Upper.SD  Middle.mean  Middle.SD  Lower.mean  Lower.SD
1  4 0.96    0.030   0.630     0.077    0.470      0.13     -0.093    0.15

```

"Source", "As", "Co", "Cu", "DAs", "DCo", "DCu", "n")

```

id  GOF.mean  GOF.SD  Upper.mean  Upper.SD  Middle.mean  Middle.SD  Lower.mean  Lower.SD
1  4 0.96    0.027   0.700     0.054    0.210      0.13     0.089    0.16

```

"Source", "As", "Co", "DAs", "DCo", "n")

```

id  GOF.mean  GOF.SD  Upper.mean  Upper.SD  Middle.mean  Middle.SD  Lower.mean  Lower.SD
1  4 0.99    0.009   0.660     0.081    0.270      0.16     0.074    0.17

```

## MIX SAMPLE 2 MODELING

### CONSENSUS RANKING

tracer score

```

1   Cu 99.4
2   Be 98.6
3   Pb 97.7
4   V 96.6
5   K 94.4
6   Al 93.4

```

CTS methodology

```

id  w1    w2    w3    Dw1    Dw2    Dw3 cons  Dmax
1  Au Hg 1.1315657 -0.1193633 -0.01220241 0.10547607 0.1024137 0.08528439 0.000 0.1054761
2  K Au 1.1350874 -0.1250000 -0.01008738 0.09182034 0.1069818 0.05705112 0.009 0.1069818
3  K Cd 1.0687500 -0.1250000 0.05625000 0.11665465 0.1172453 0.09402940 0.022 0.1172453
4  V Be 0.4386248 0.4476235 0.11375167 0.03629542 0.1246265 0.12277892 0.813 0.1246265
5  V Cu 0.5793876 0.2889624 0.13165003 0.06105178 0.1051725 0.12989725 0.822 0.1298973
6  K Pb 0.8049935 -0.1250000 0.32000653 0.12956183 0.1053746 0.14524013 0.088 0.1452401

```

#Explore those pairs (e.g. Au & Hg)

```

tracer      err score
4   K 0.00145464 94.4

```

#Explore those pairs (e.g. K & Au)

```

tracer      err score
4   K 1.665335e-16 94.4

```

#Explore those pairs (e.g. K & Cd)

```

tracer      err score
4   K 2.220446e-16 94.4

```

8 V 2.220026e-02 96.6

### #Explore those pairs (e.g. V & Be)

|    | tracer | err          | score |
|----|--------|--------------|-------|
| 1  | Al     | 2.374019e-02 | 93.4  |
| 6  | Fe     | 1.006018e-02 | 81.3  |
| 8  | V      | 3.330669e-16 | 96.6  |
| 28 | Be     | 4.996004e-16 | 98.6  |

### #Explore those pairs (e.g. V & Cu)

|    | tracer | err          | score |
|----|--------|--------------|-------|
| 8  | V      | 1.665335e-16 | 96.6  |
| 12 | Cu     | 1.110223e-16 | 99.4  |
| 13 | Pb     | 1.441867e-02 | 97.7  |

### #Explore those pairs (e.g. K & Pb)

|    | tracer | err          | score |
|----|--------|--------------|-------|
| 4  | K      | 5.551115e-17 | 94.4  |
| 6  | Fe     | 6.720180e-03 | 81.3  |
| 13 | Pb     | 3.330669e-16 | 97.7  |

```
data1 <- select(data,"ID","Source","K","V","DK","DV","n")
```

| id | GOF.mean | GOF.SD     | Upper.mean | Upper.SD  | Middle.mean | Middle.SD   | Lower.mean | Lower.SD  |
|----|----------|------------|------------|-----------|-------------|-------------|------------|-----------|
| 1  | 4        | 0.99454308 | 0.01691122 | 0.9573133 | 0.2167945   | -0.12444558 | 0.09928421 | 0.1671323 |

```
data1 <- select(data,"ID","Source","Be","V","Al","Fe","DBe","DV","DAI","DFe","n")
```

| id | GOF.mean | GOF.SD     | Upper.mean | Upper.SD   | Middle.mean | Middle.SD | Lower.mean | Lower.SD   |
|----|----------|------------|------------|------------|-------------|-----------|------------|------------|
| 1  | 4        | 0.91703412 | 0.04159884 | 0.41582777 | 0.07347942  | 0.5538645 | 0.1150443  | 0.03030768 |

```
data1 <- select(data,"ID","Source","Cu","Pb","V","Fe","DCu","DPb","DV","DFe","n")
```

| id | GOF.mean | GOF.SD     | Upper.mean | Upper.SD   | Middle.mean | Middle.SD | Lower.mean | Lower.SD   |
|----|----------|------------|------------|------------|-------------|-----------|------------|------------|
| 1  | 4        | 0.92939428 | 0.03957419 | 0.59254563 | 0.07074942  | 0.2965161 | 0.1167933  | 0.11093831 |

```
data1 <- select(data,"ID","Source","Cu","Pb","V","DCu","DPb","DV","n")
```

| id | GOF.mean | GOF.SD | Upper.mean | Upper.SD | Middle.mean | Middle.SD | Lower.mean | Lower.SD |
|----|----------|--------|------------|----------|-------------|-----------|------------|----------|
| 1  | 4        | 0.96   | 0.027      | 0.603    | 0.062       | 0.29      | 0.107      | 0.102    |

```
data1 <- select(data,"ID","Source","Pb","K","Fe","DPb","DK","DFe","n")
```

| id | GOF.mean | GOF.SD     | Upper.mean | Upper.SD  | Middle.mean | Middle.SD   | Lower.mean | Lower.SD  |
|----|----------|------------|------------|-----------|-------------|-------------|------------|-----------|
| 1  | 4        | 0.92407439 | 0.06279407 | 0.7724627 | 0.1353151   | -0.08447067 | 0.11342630 | 0.3120080 |
